# Supplementary material
Source: PubMed Central journal article supplement (PMC5095224)

# Aeshna1-02 RAW

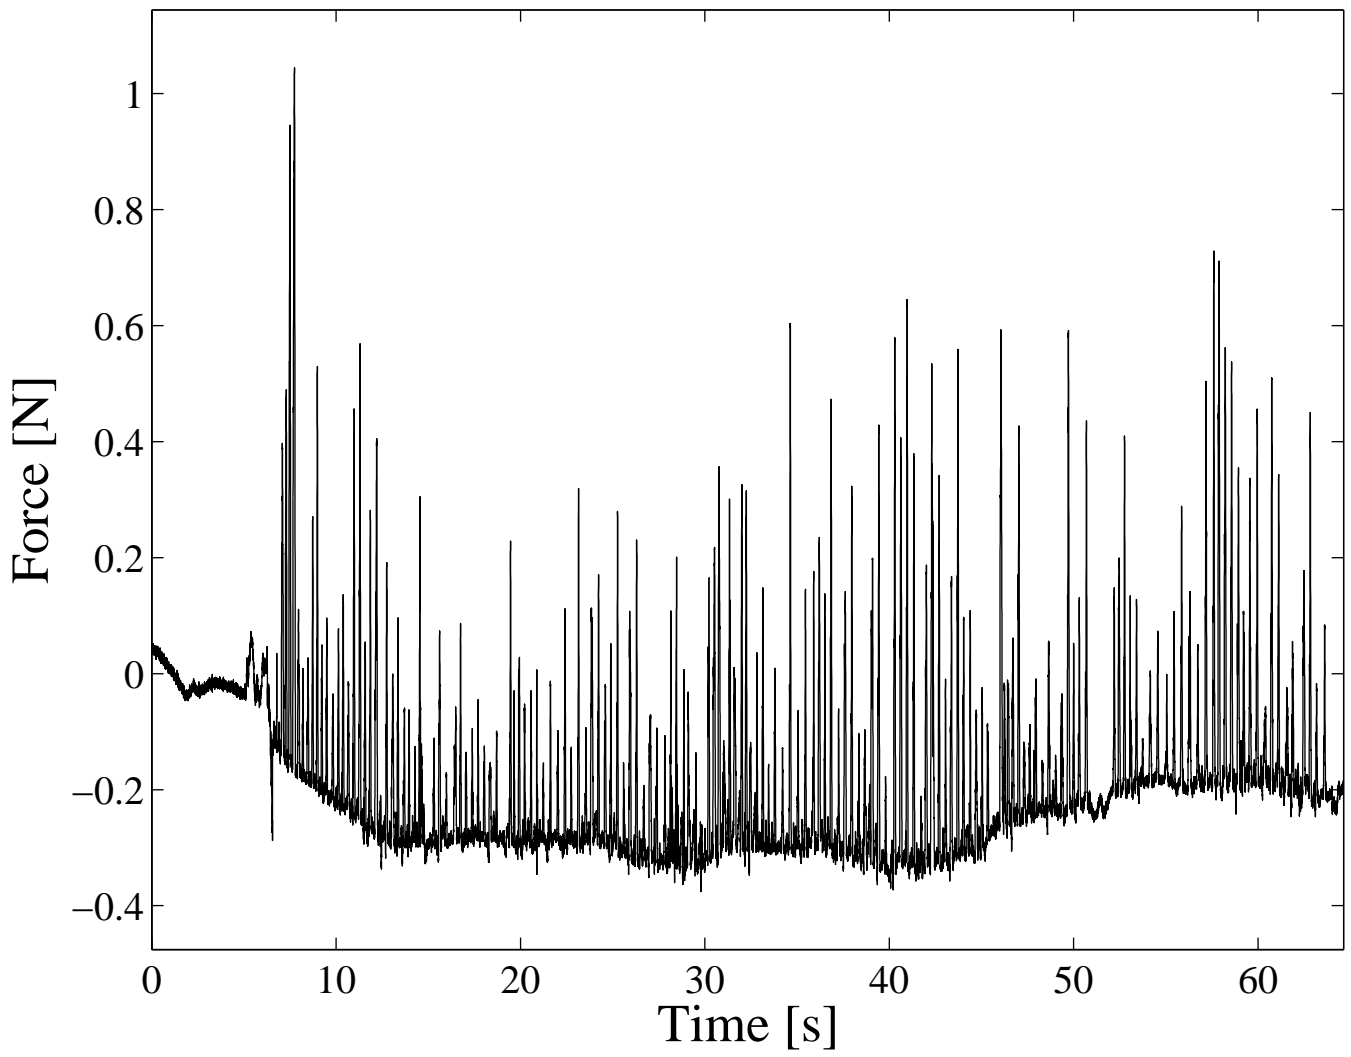

# Aeshna1-04 RAW

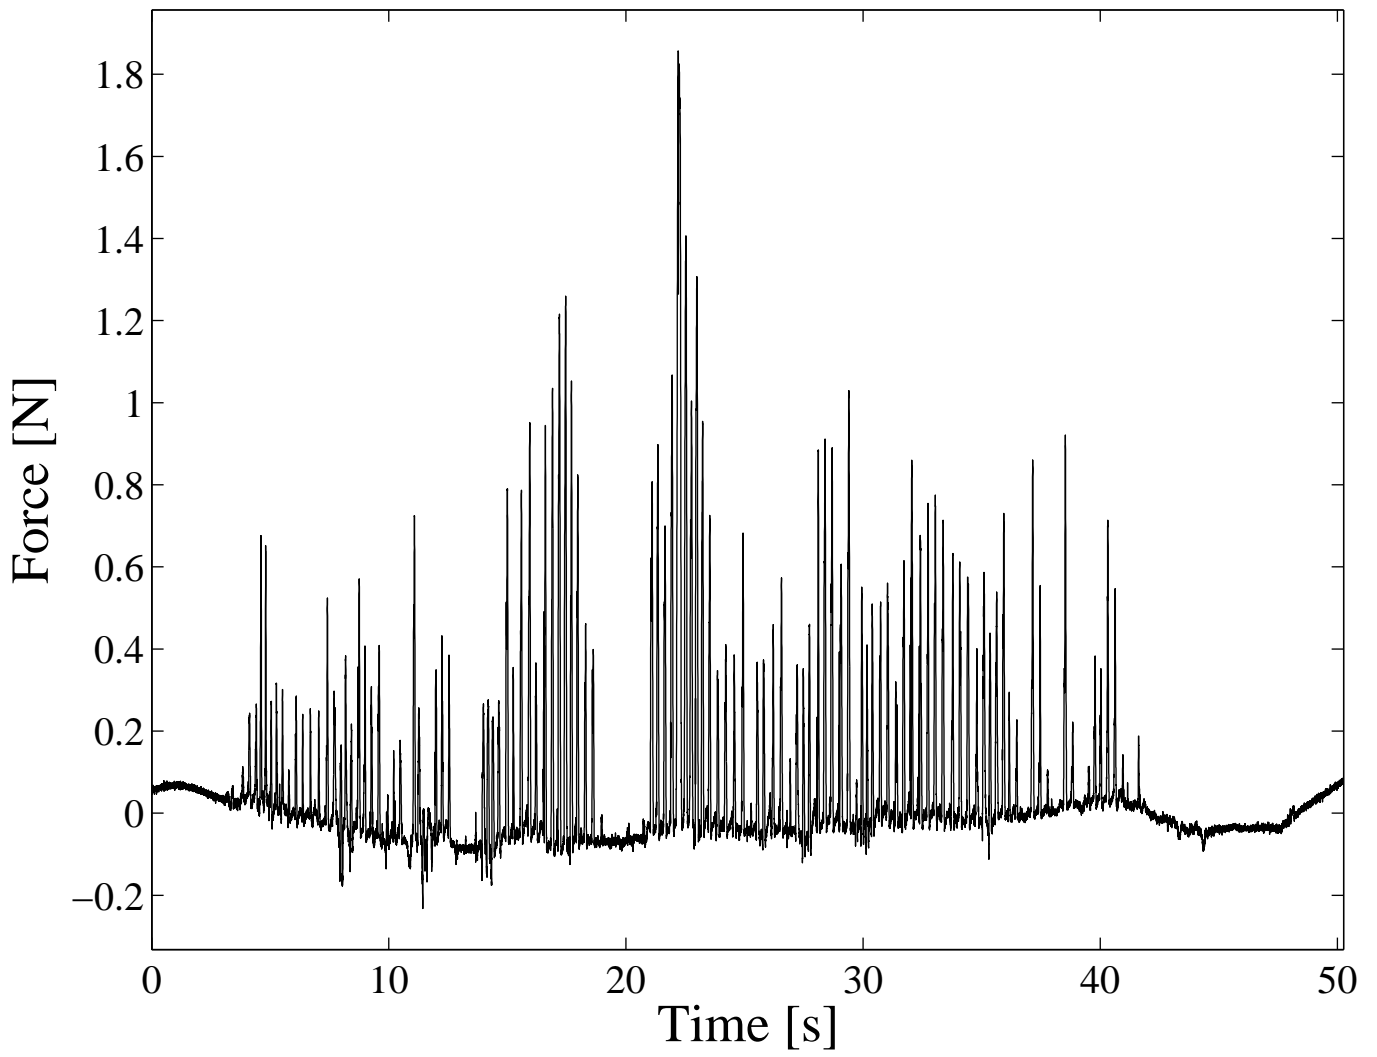

# Aeshna1-05 RAW

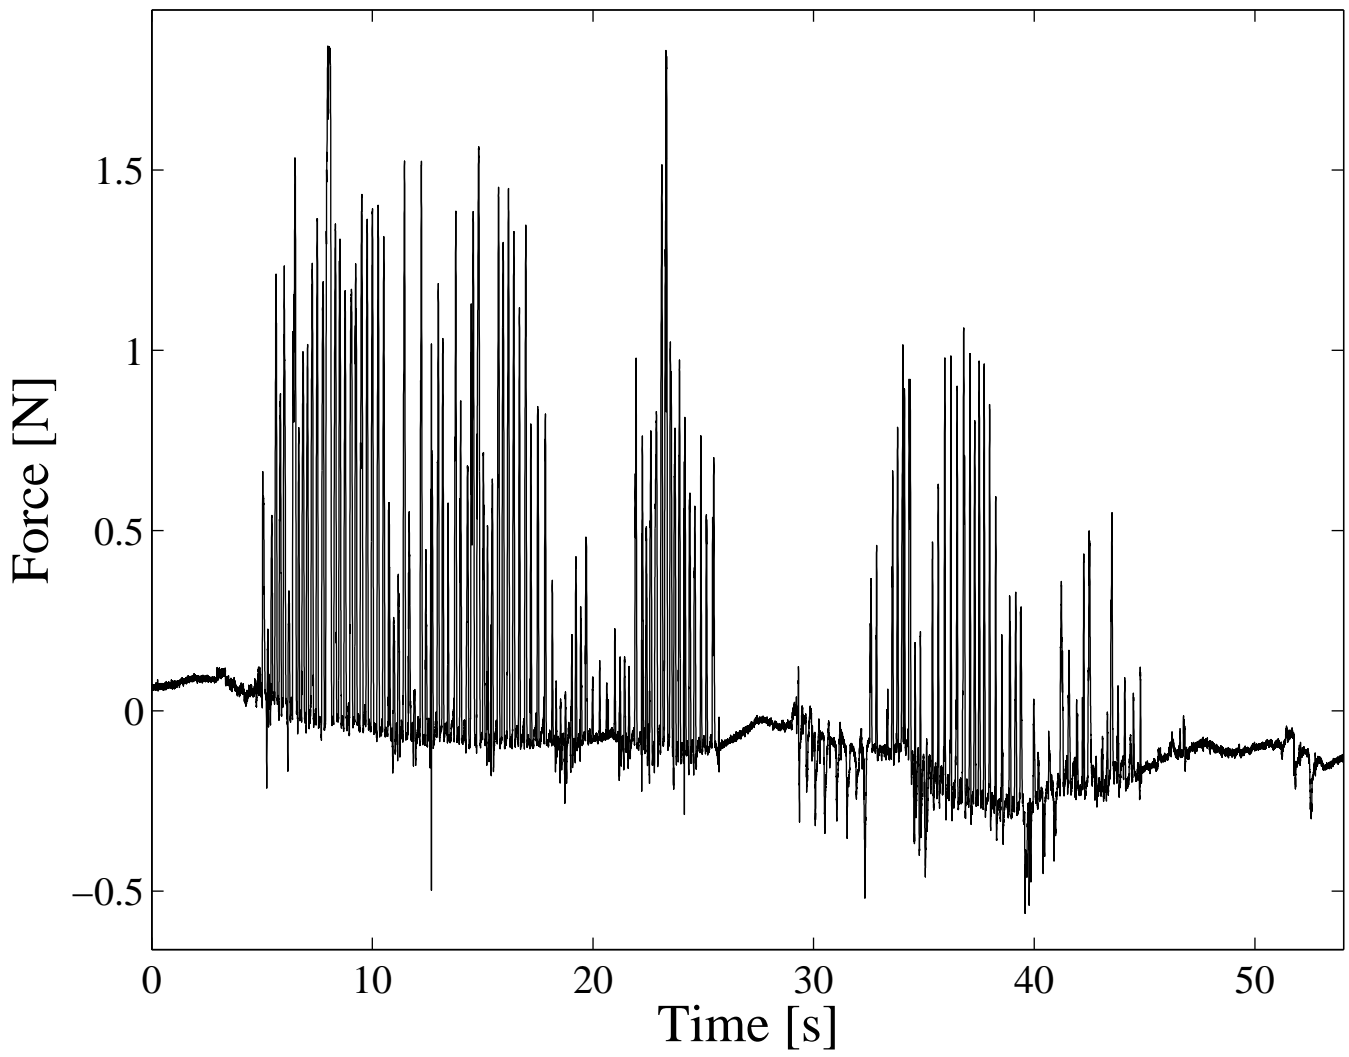

# Aeshna1-06 RAW

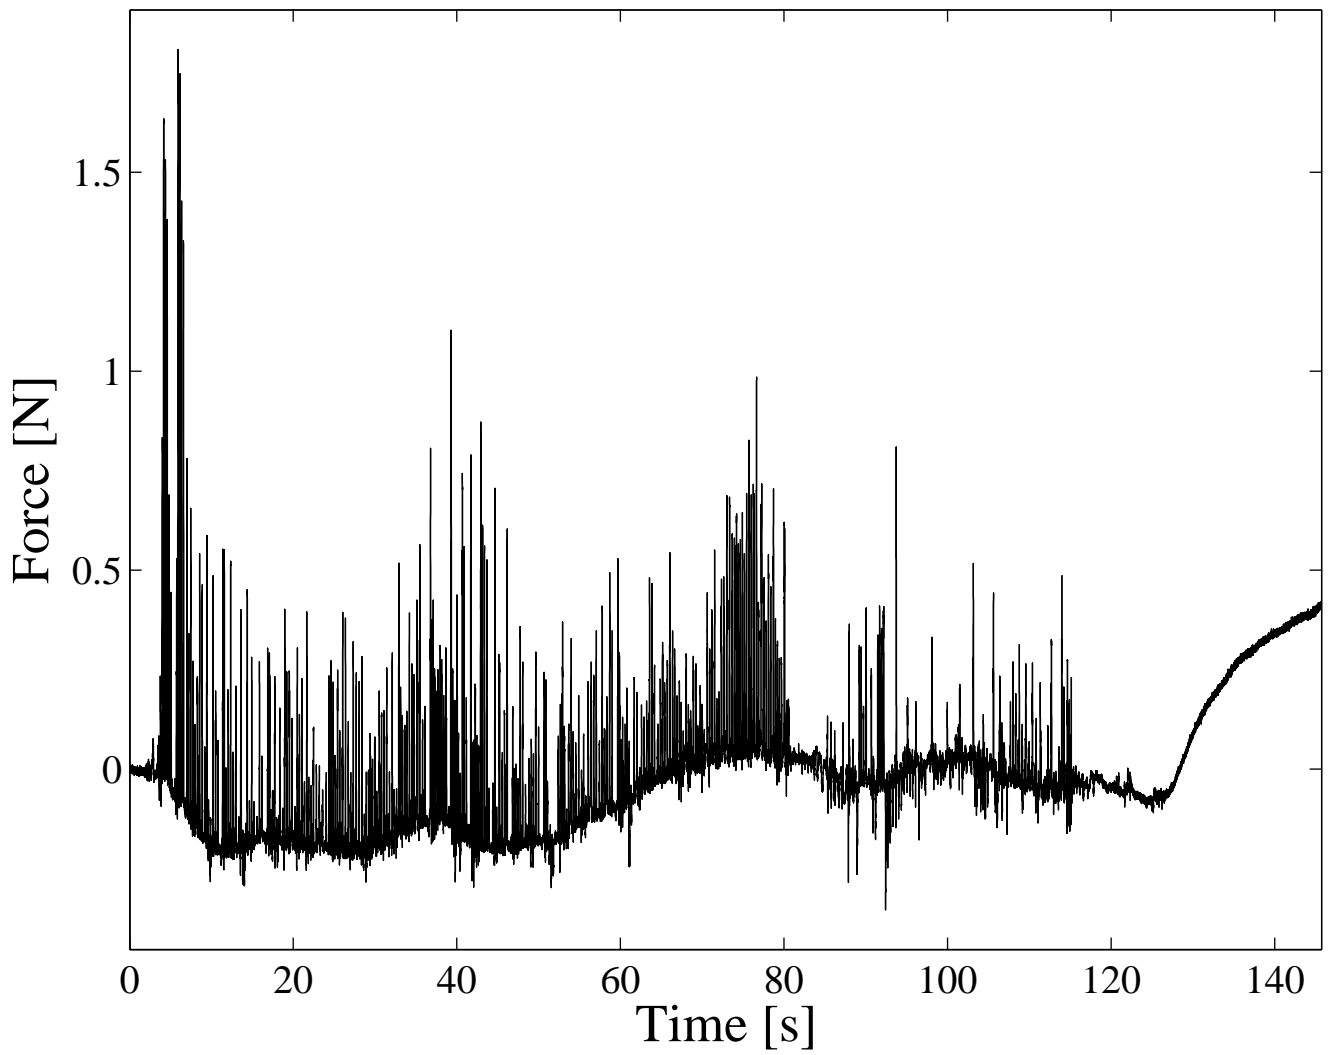

Aeshna1-07 RAW

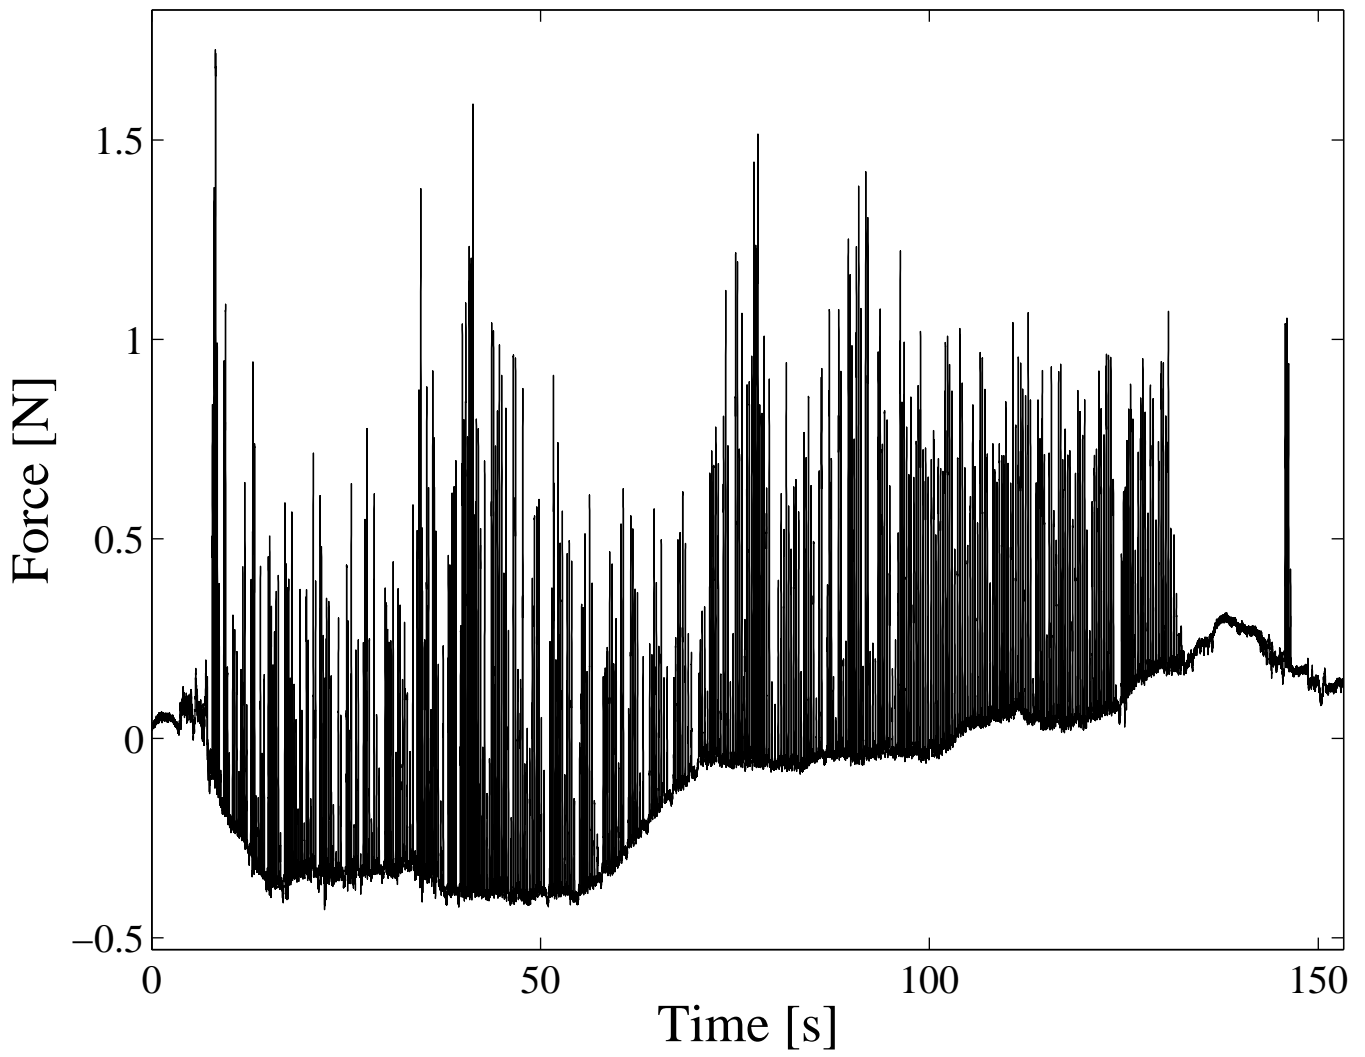

Anax-03 RAW

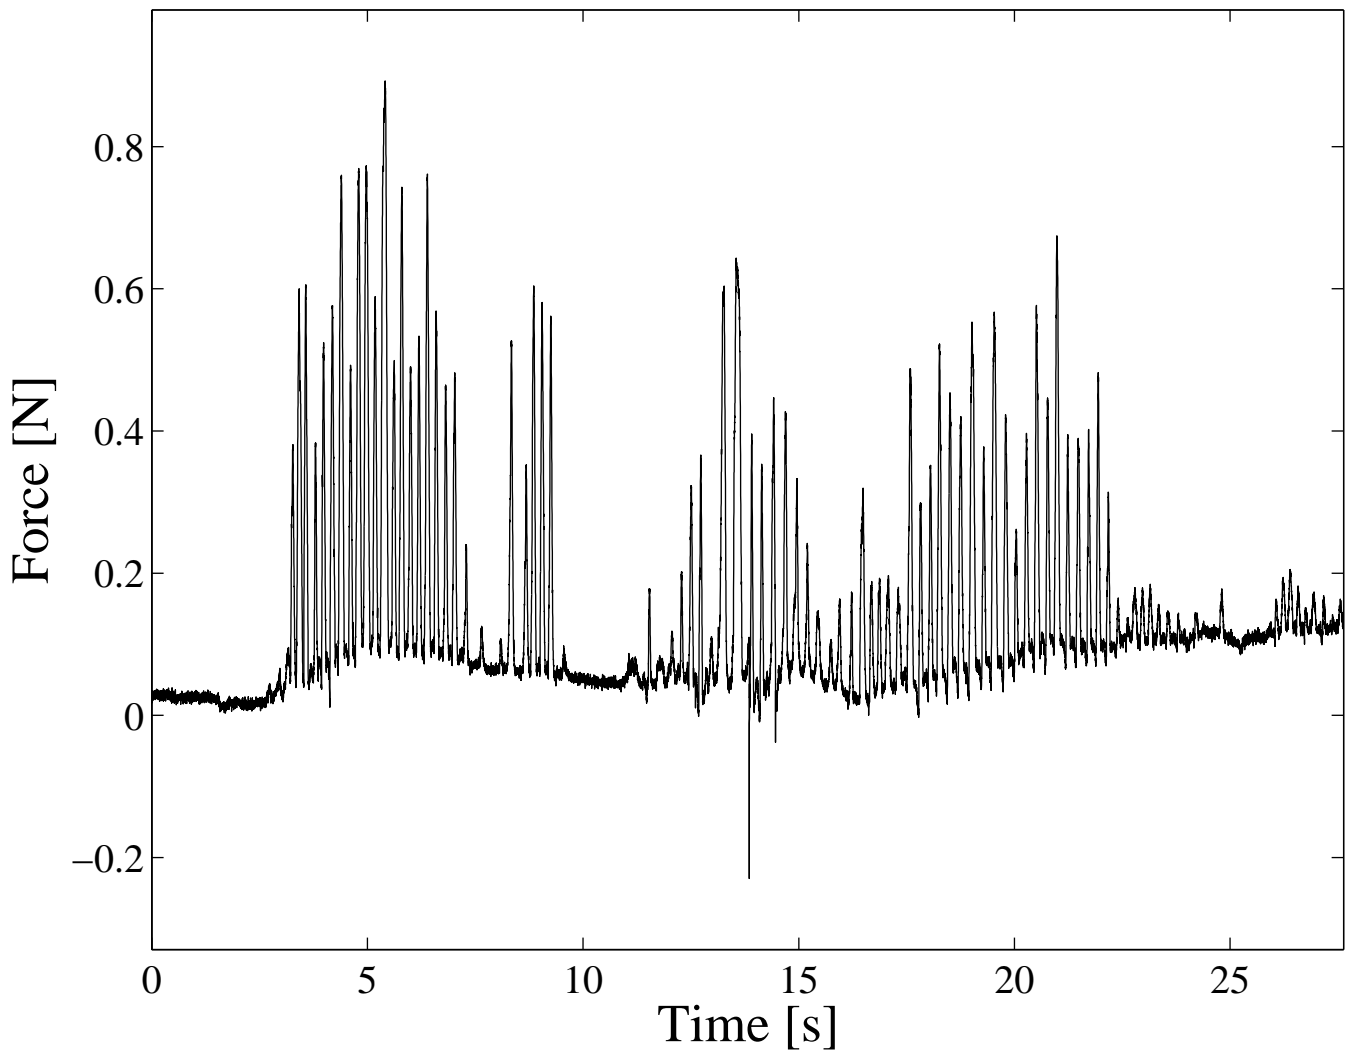

# Anax-04 RAW

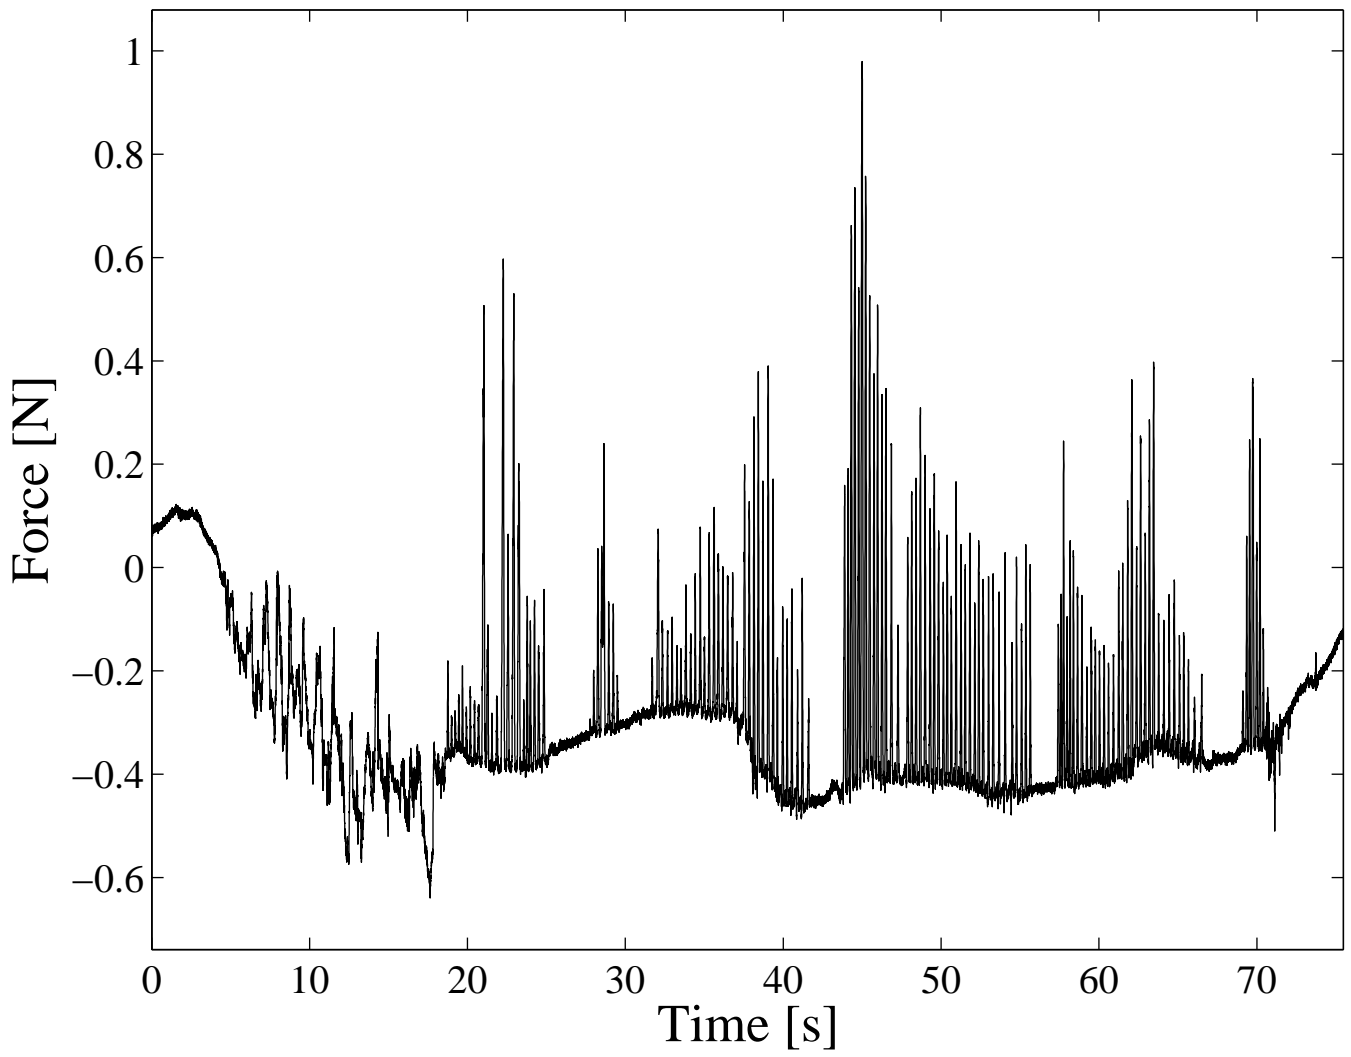

Anax-05 RAW

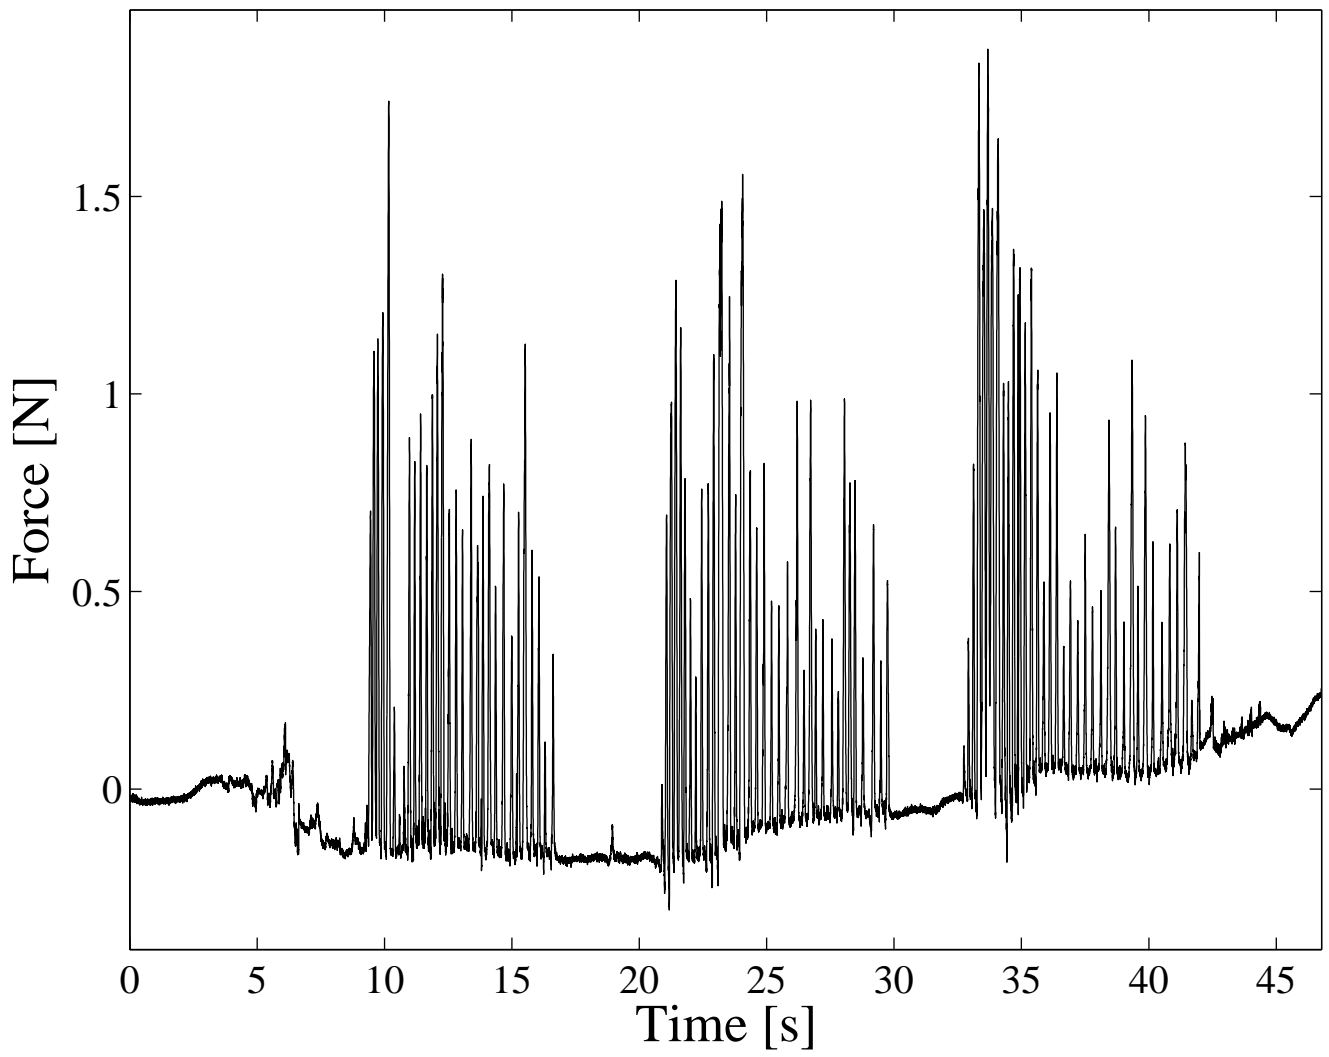



Anax-06 RAW

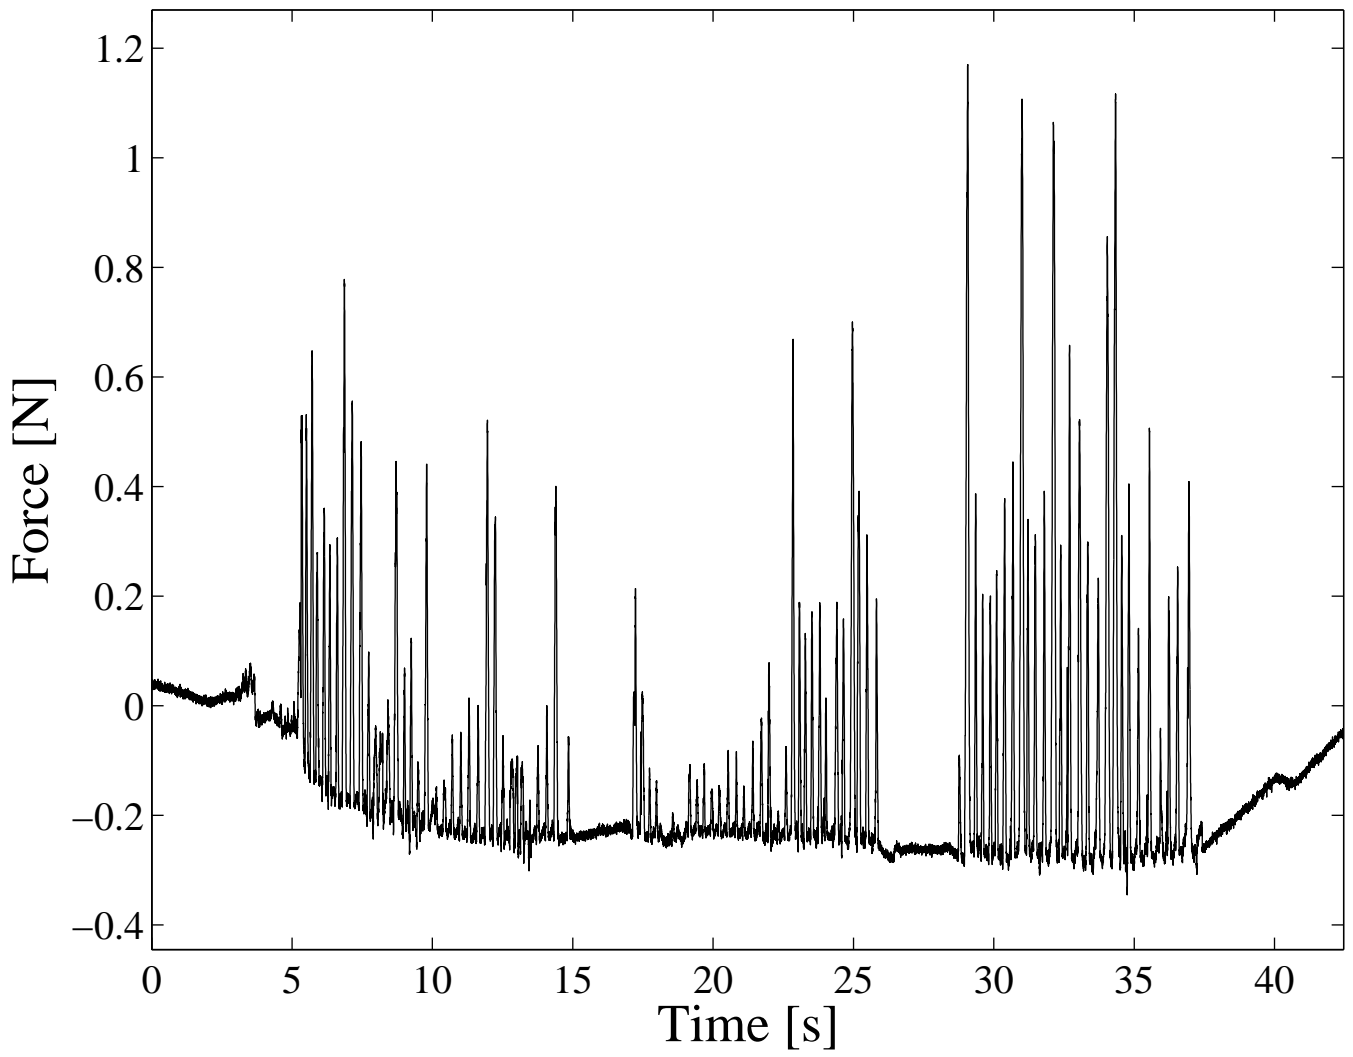

# Cordule RAW

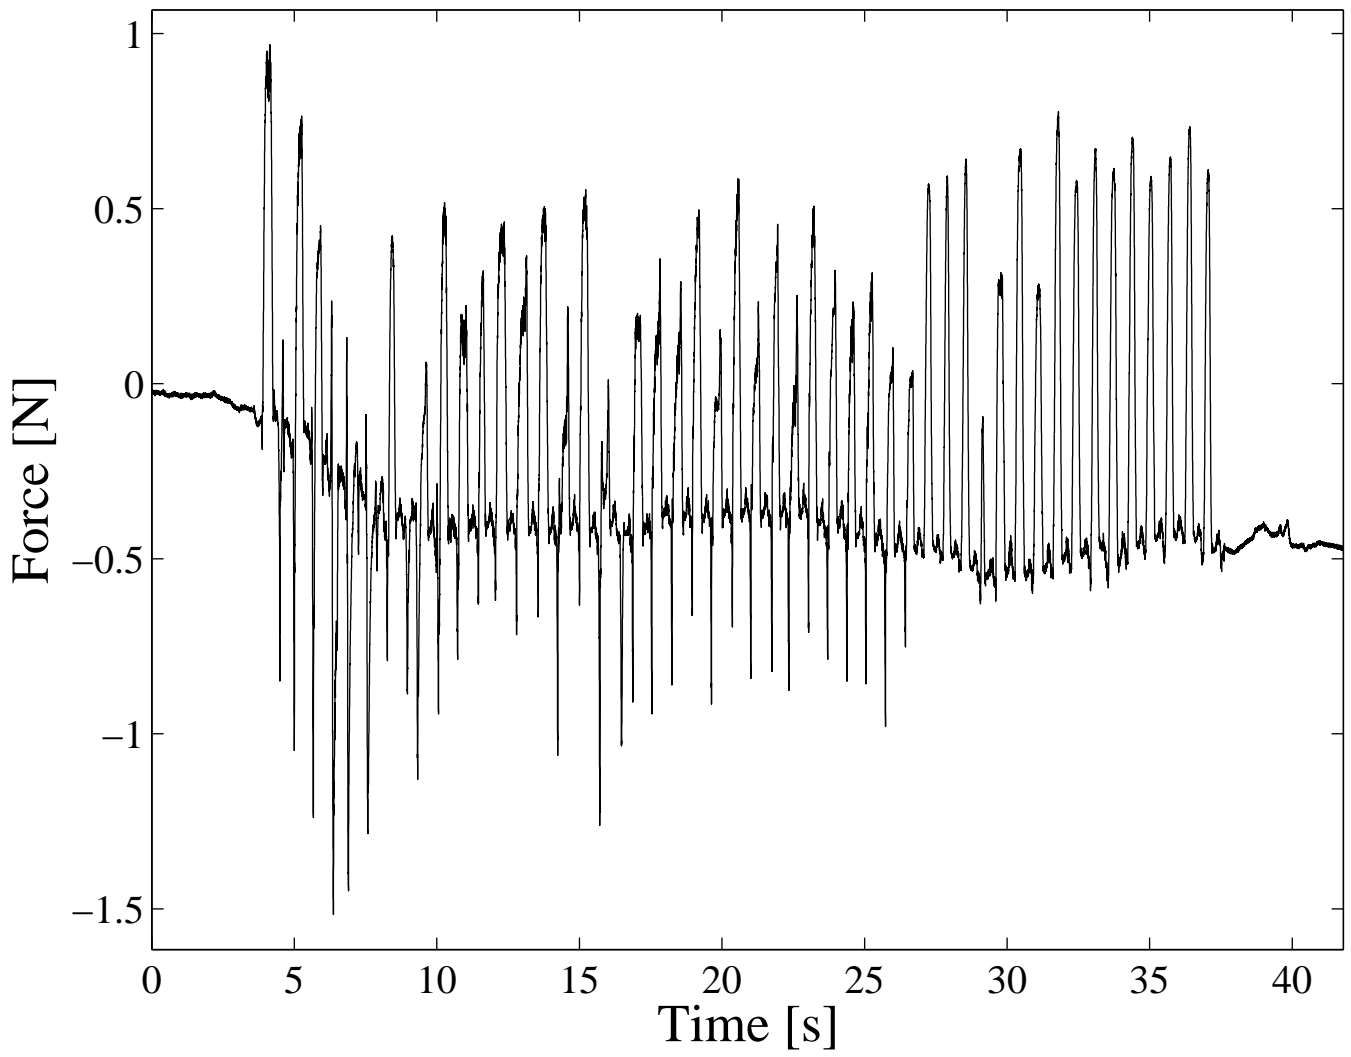

### Cordule-3 RAW

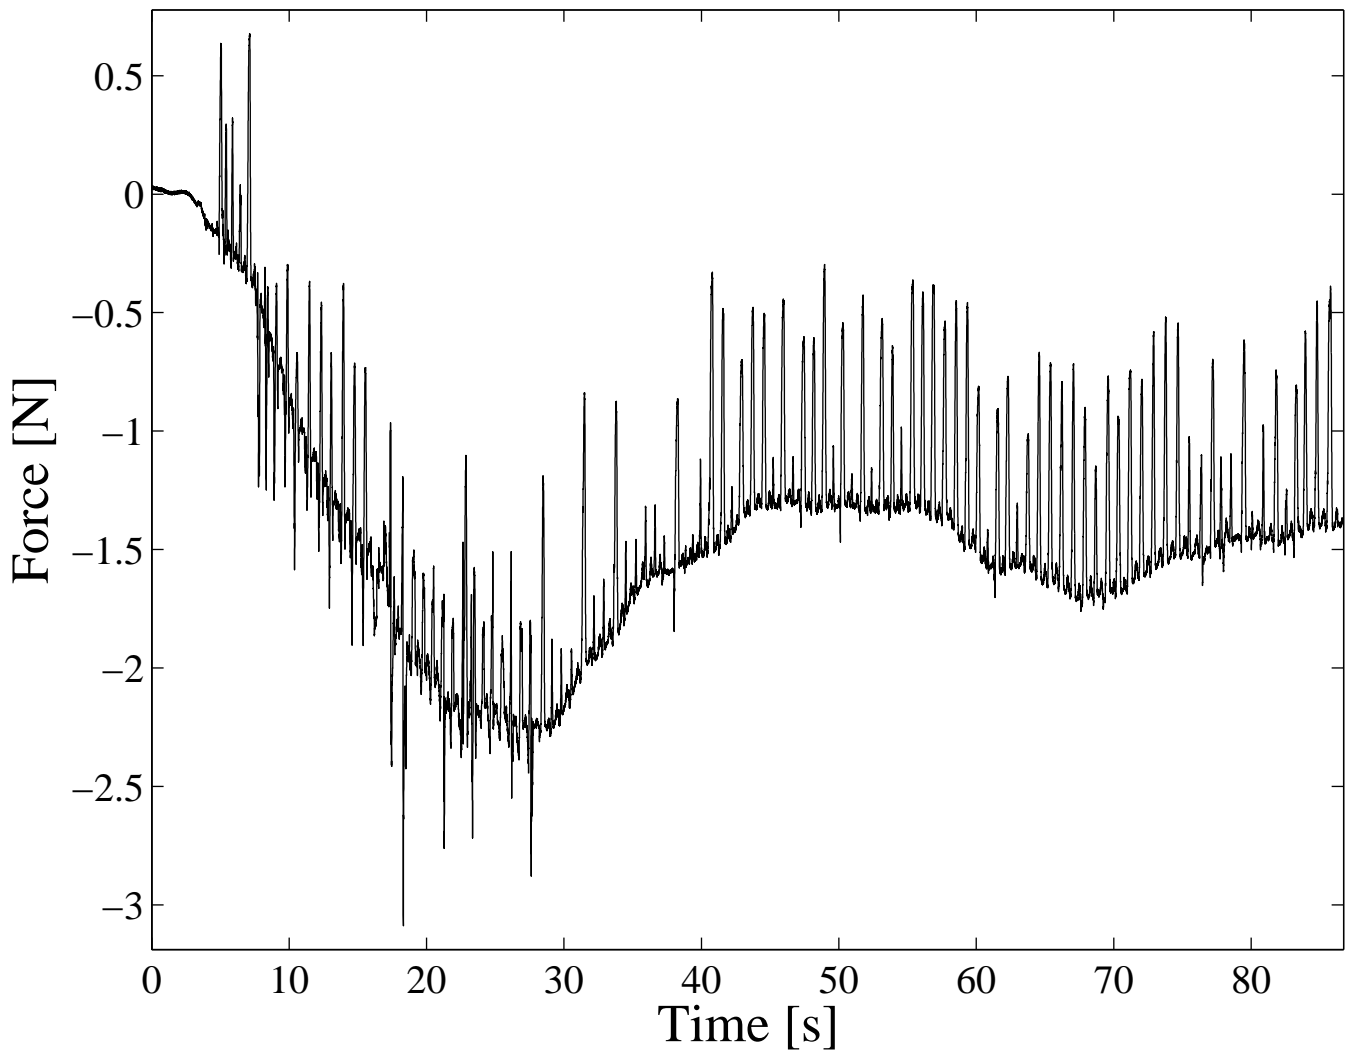

# Gomphus-02 RAW

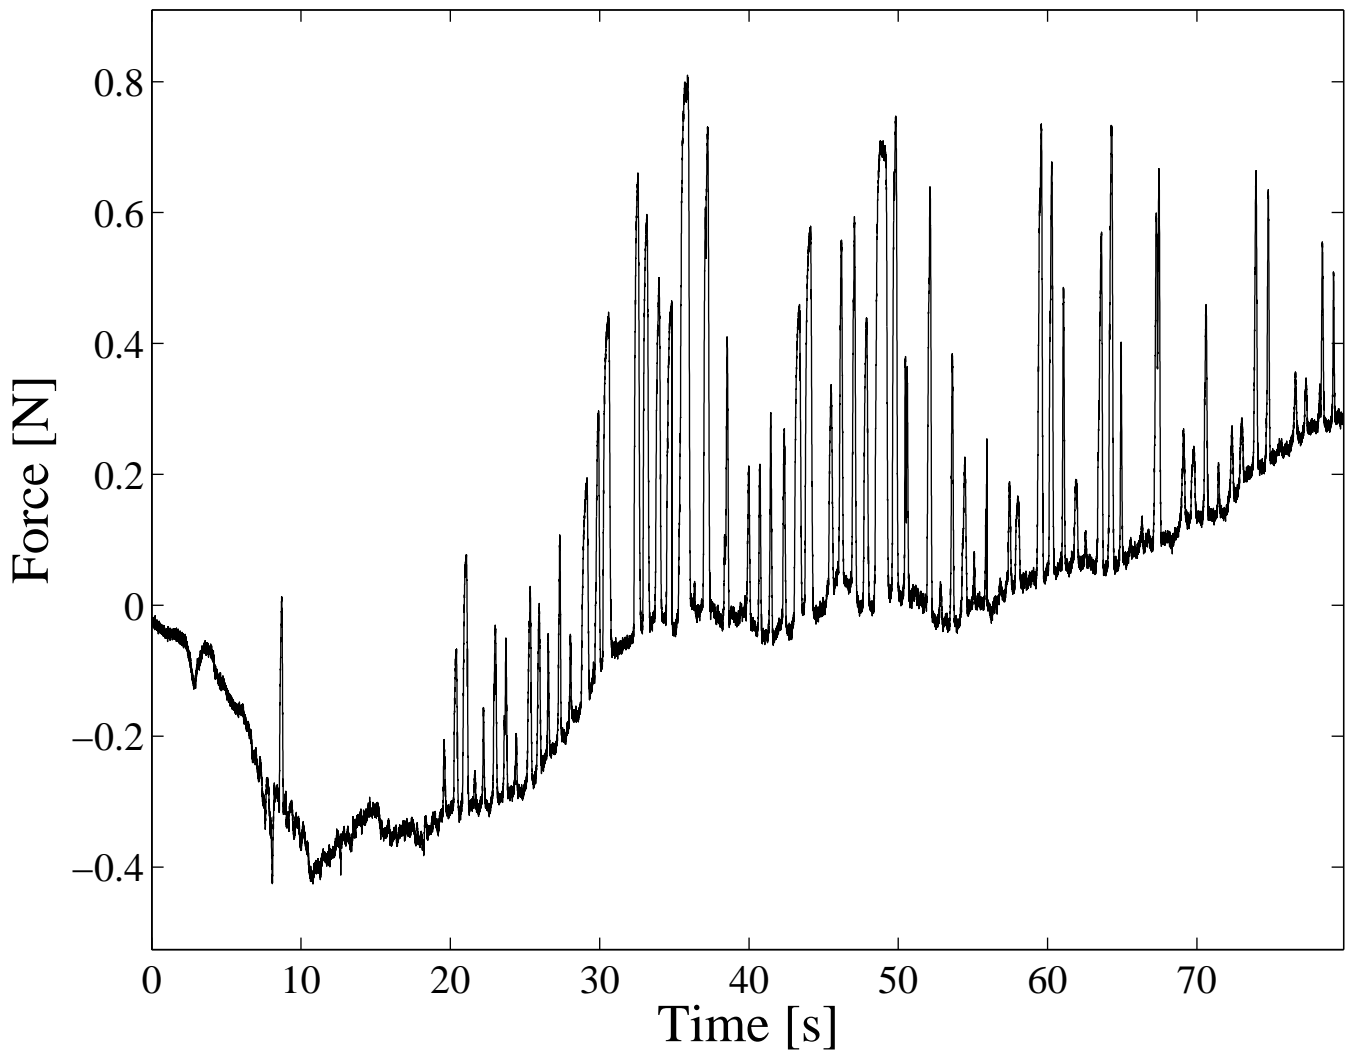

# Gomphus2-01 RAW

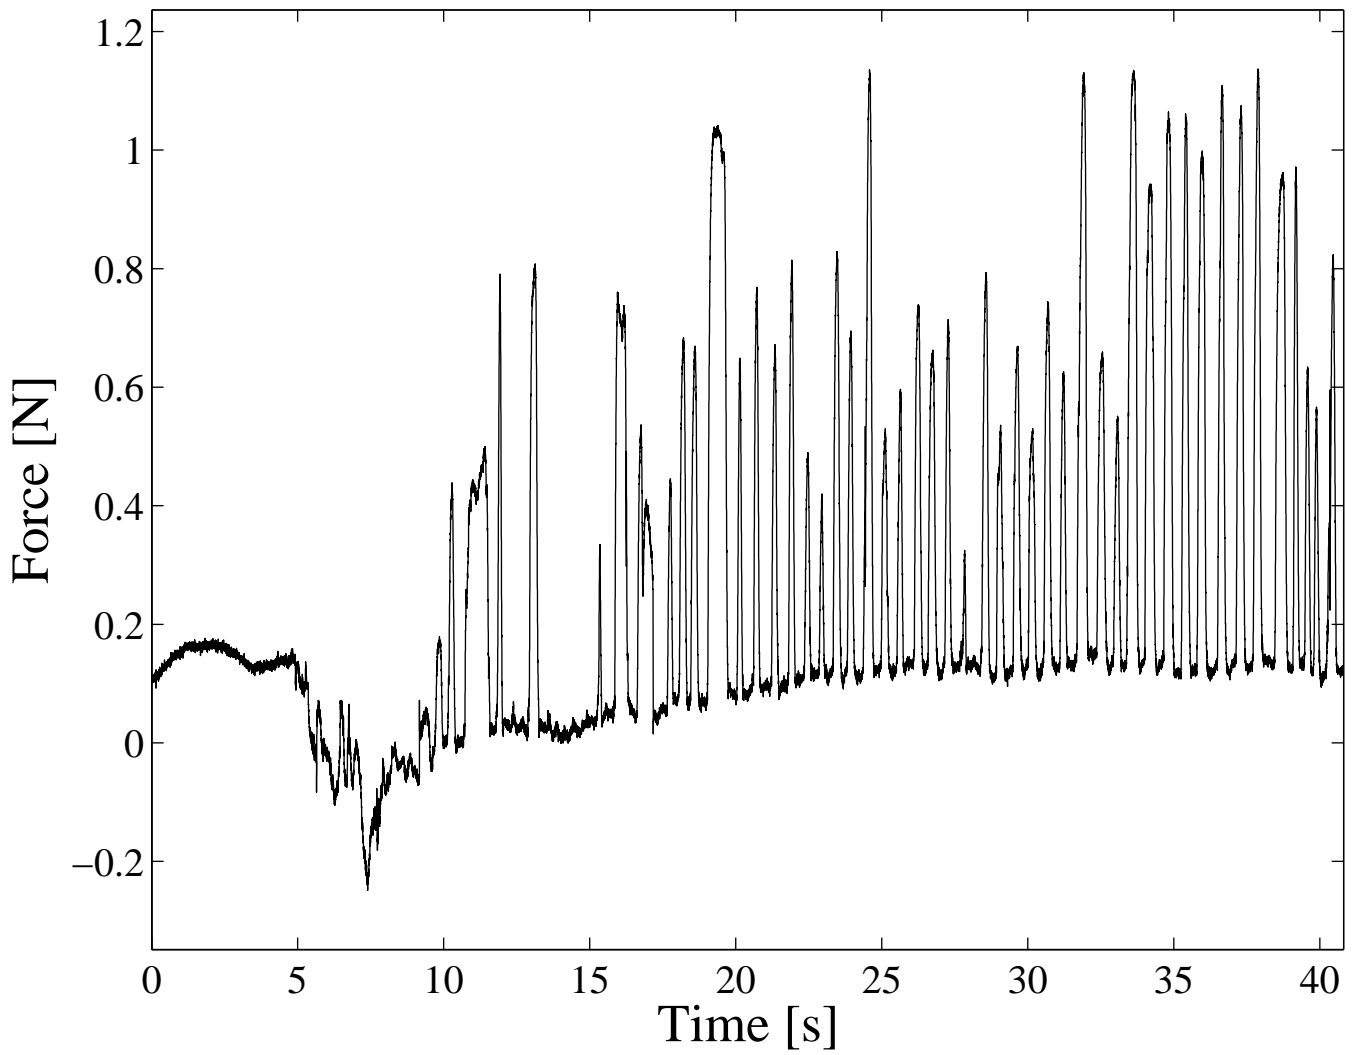

# Gomphus2-02 RAW

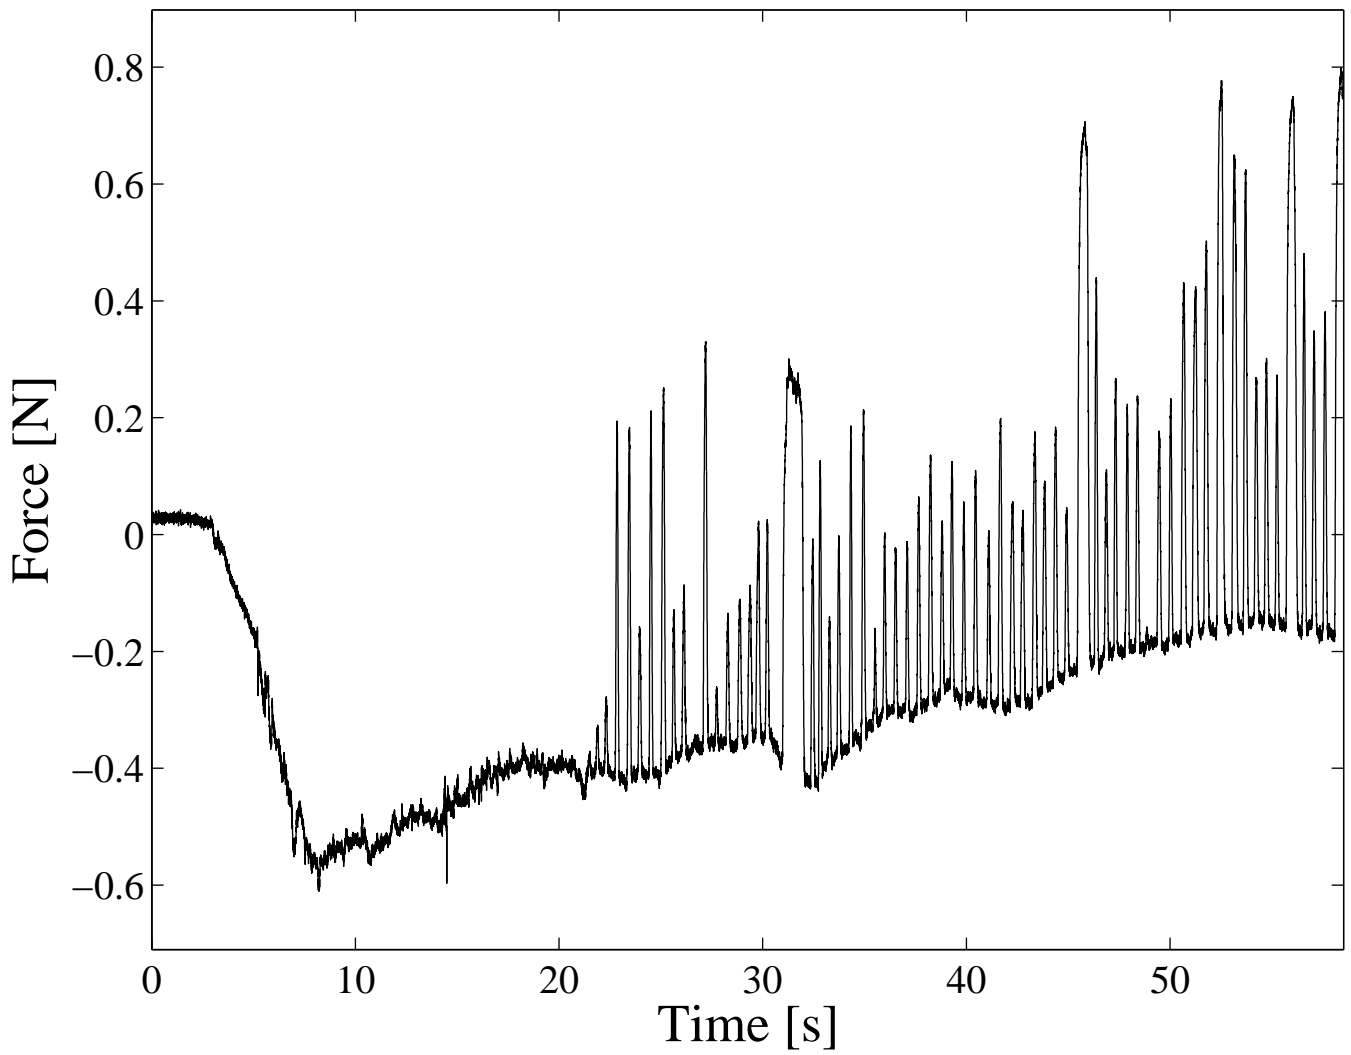

# Gomphus-03 RAW

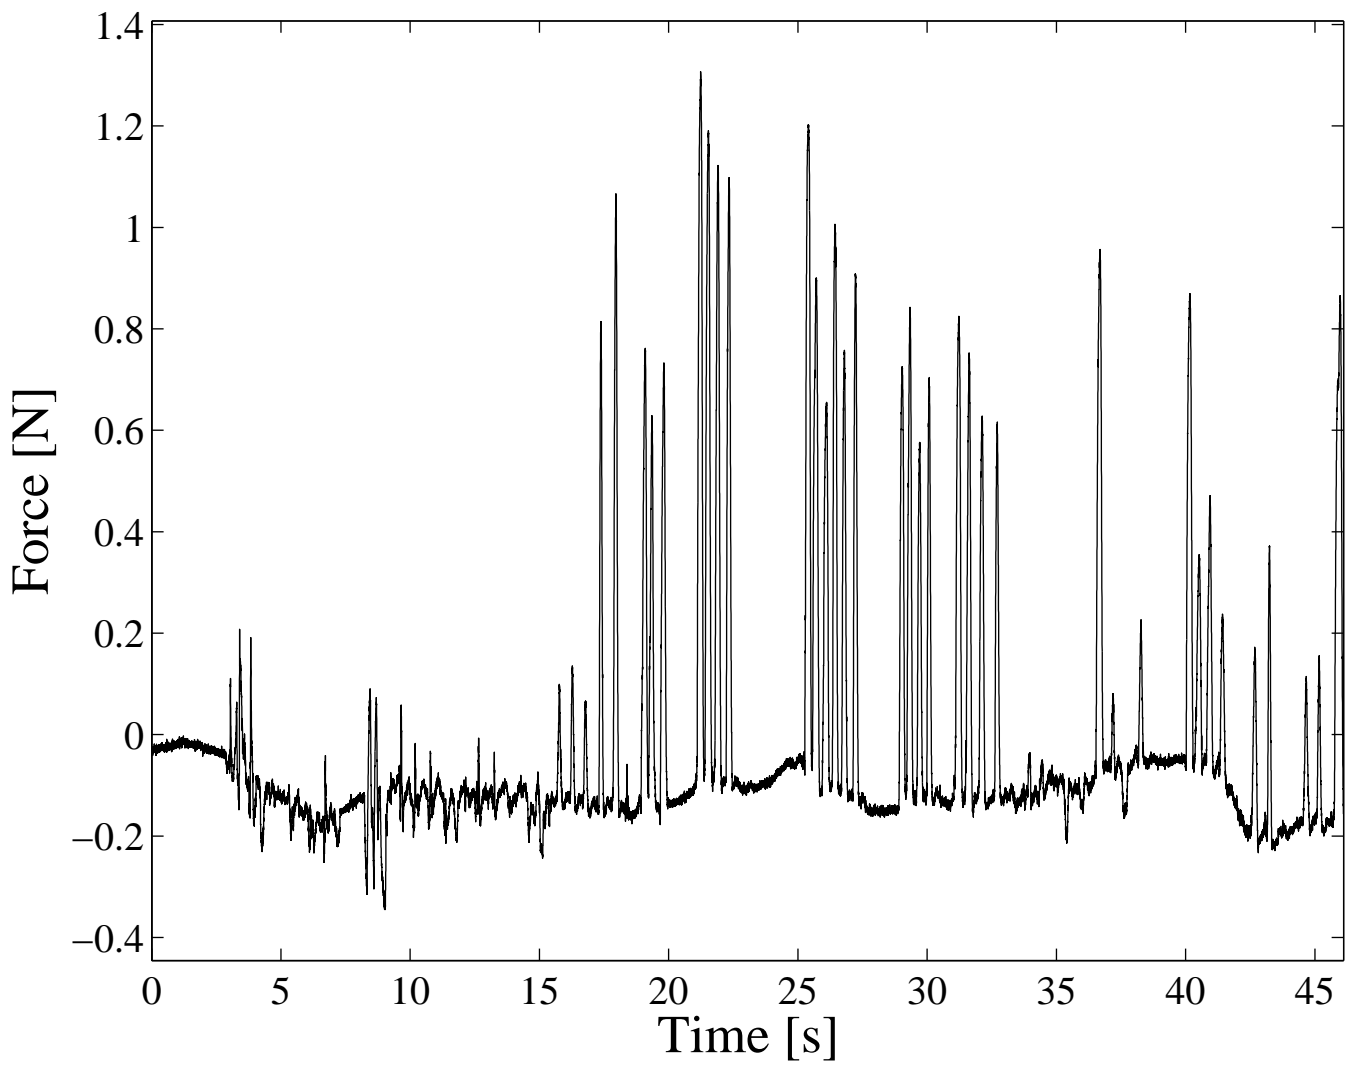

# Gomphus3-01 RAW

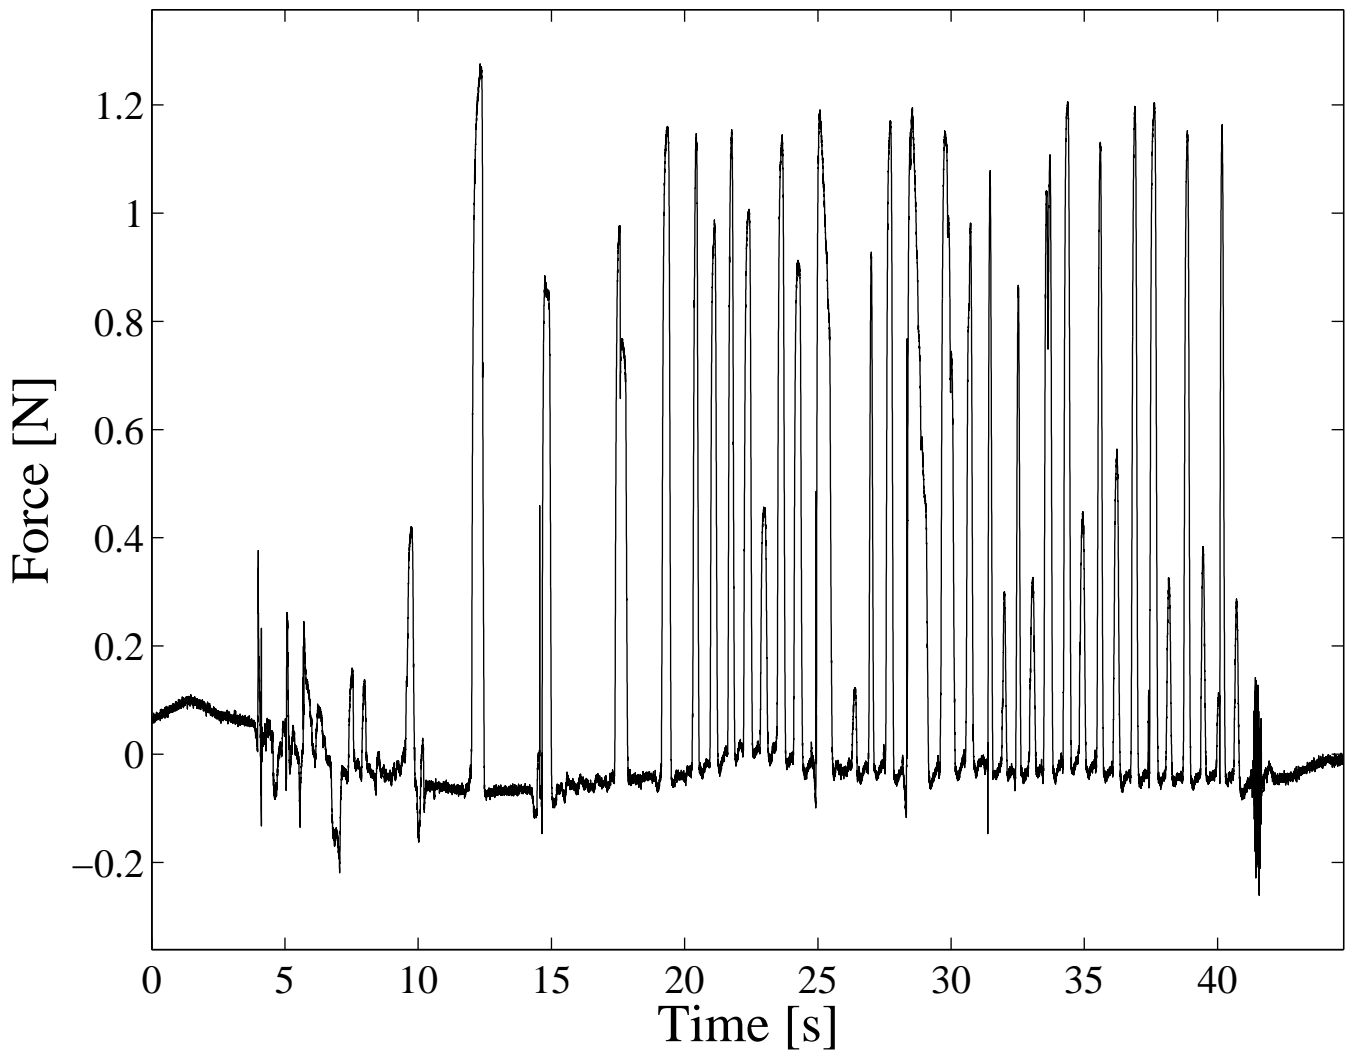



# Gomphus3-02 RAW

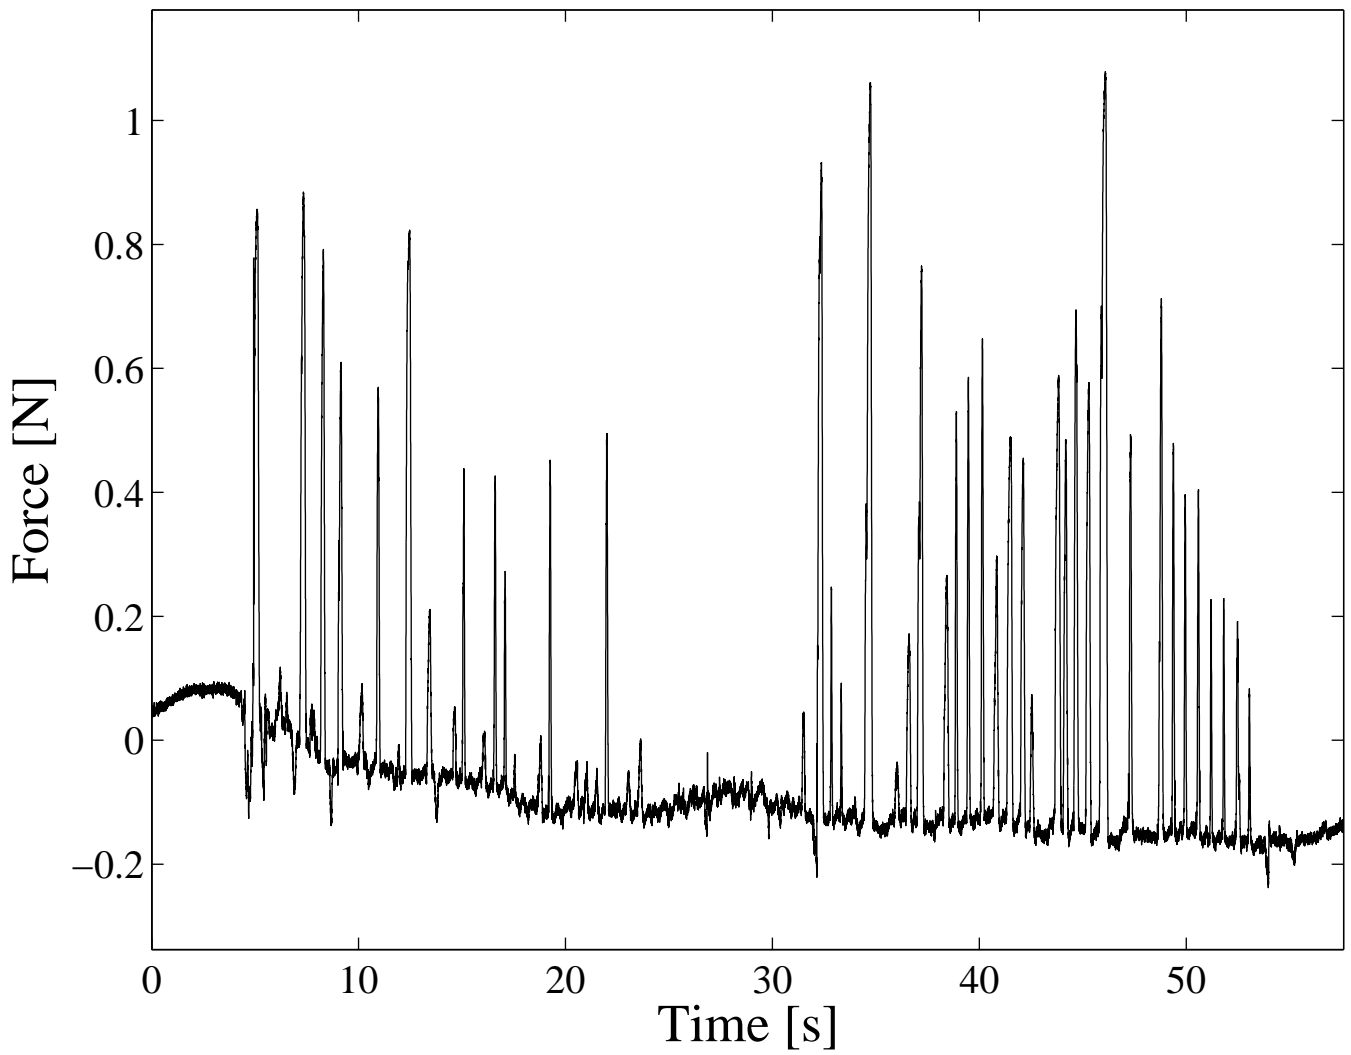

# Gomphus3-03 RAW

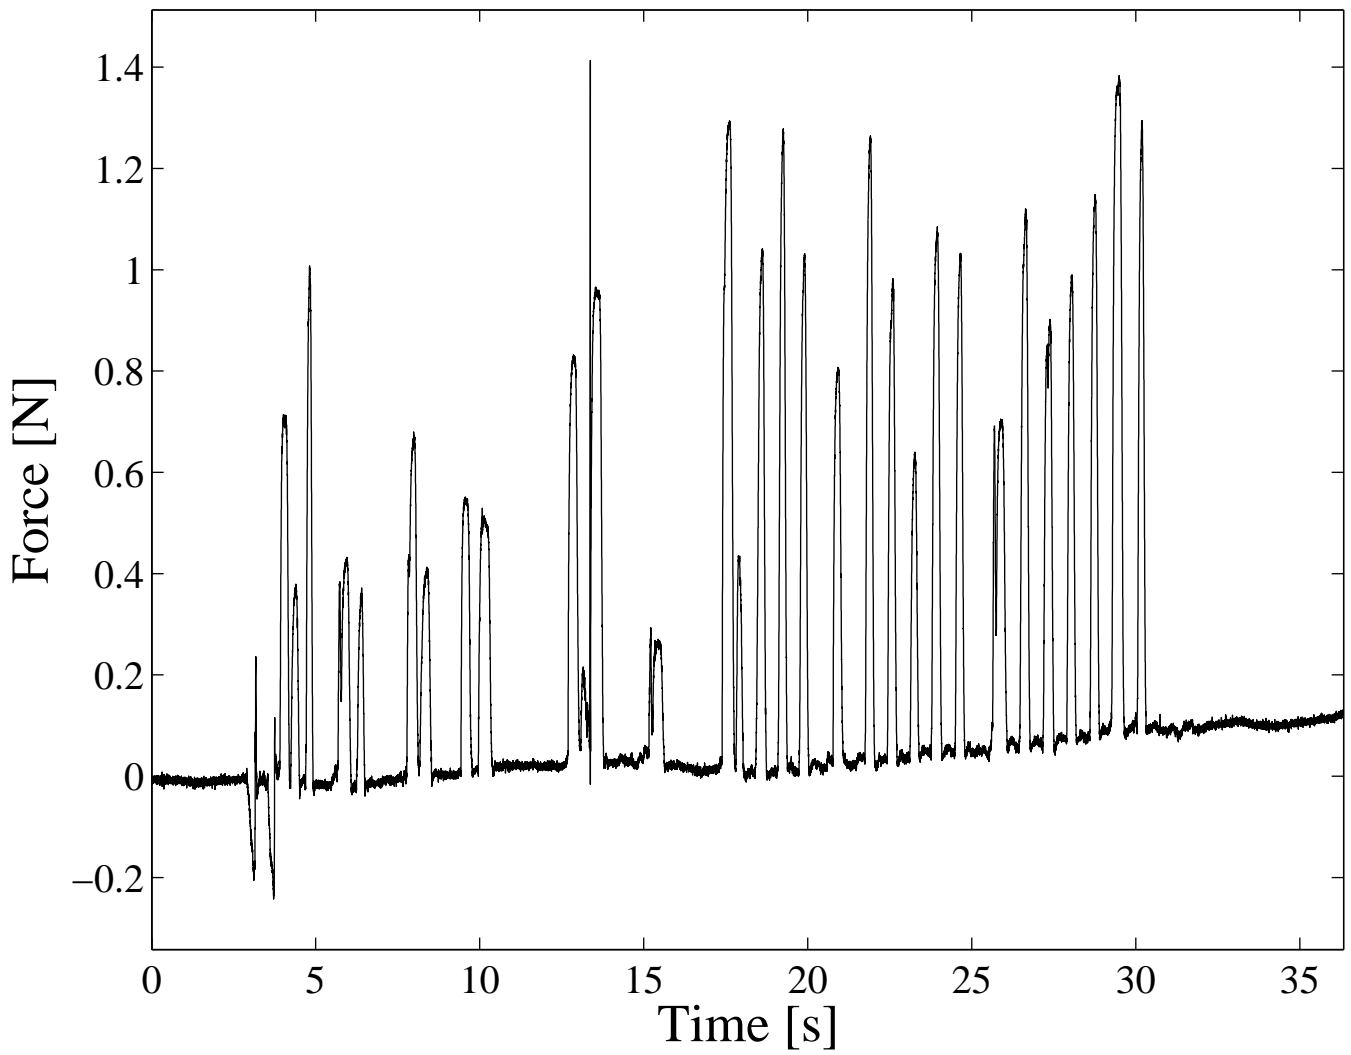

# Gomphus3-04 RAW

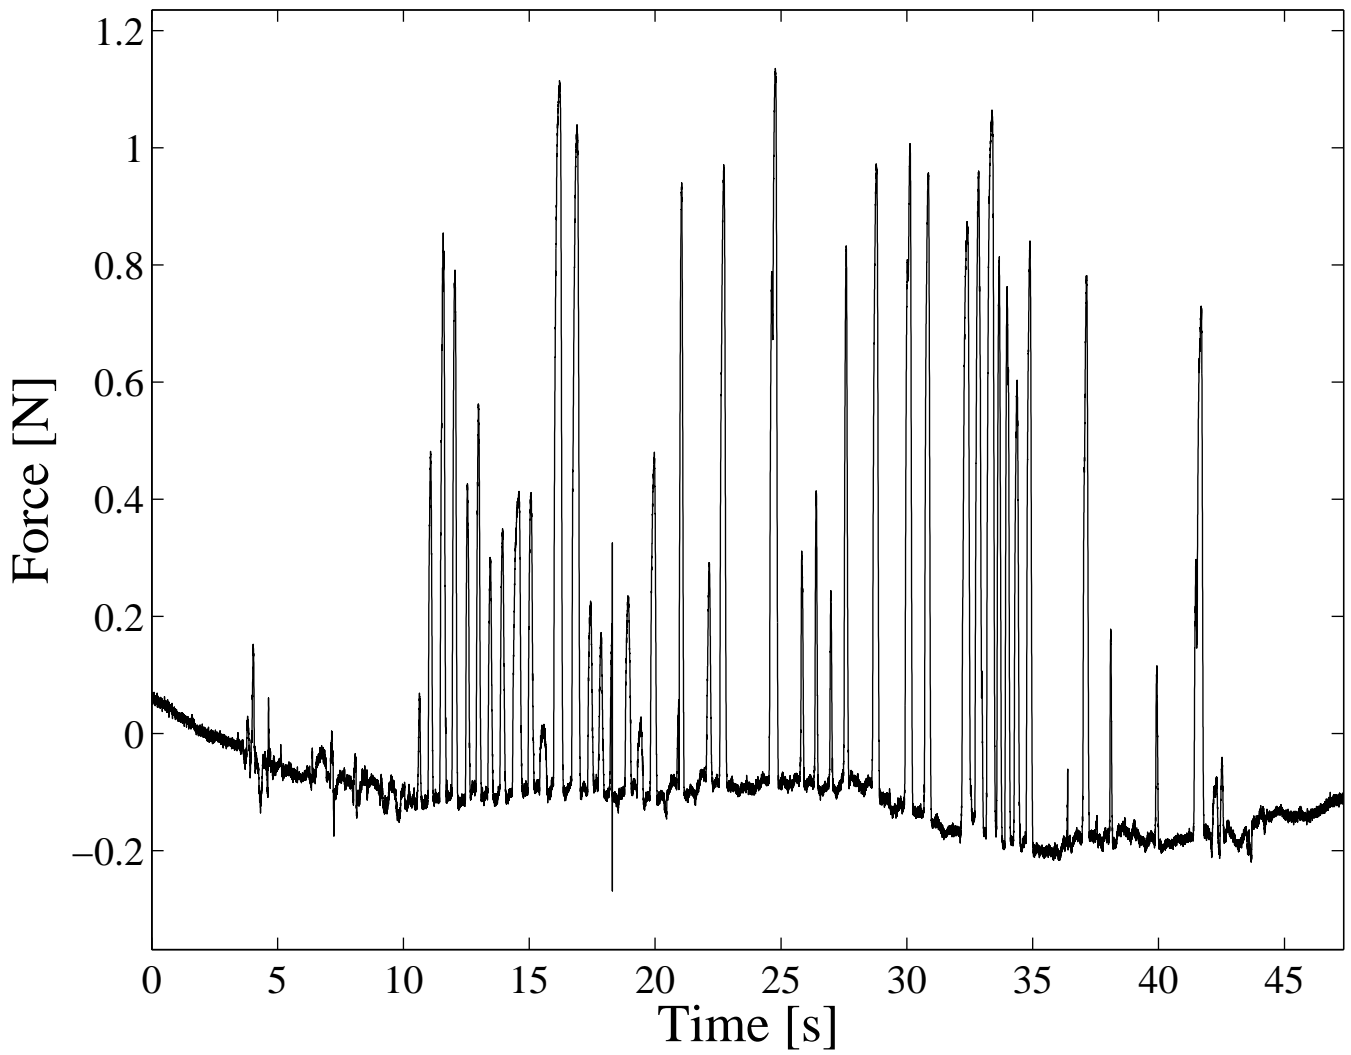

Supplement: rsif20160675supp1.pdf [file rsif20160675supp1.pdf]
