# Supplementary material
Source: PubMed Central journal article supplement (PMC5095224)

### Aeshna/Sympetrum

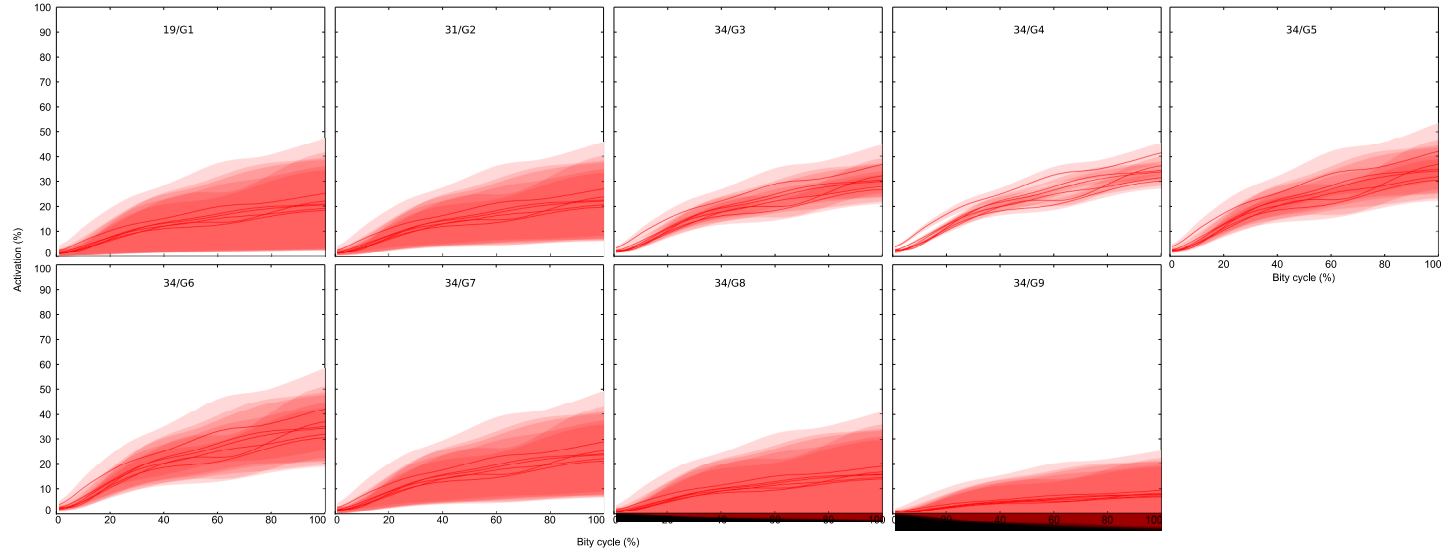

### Anax

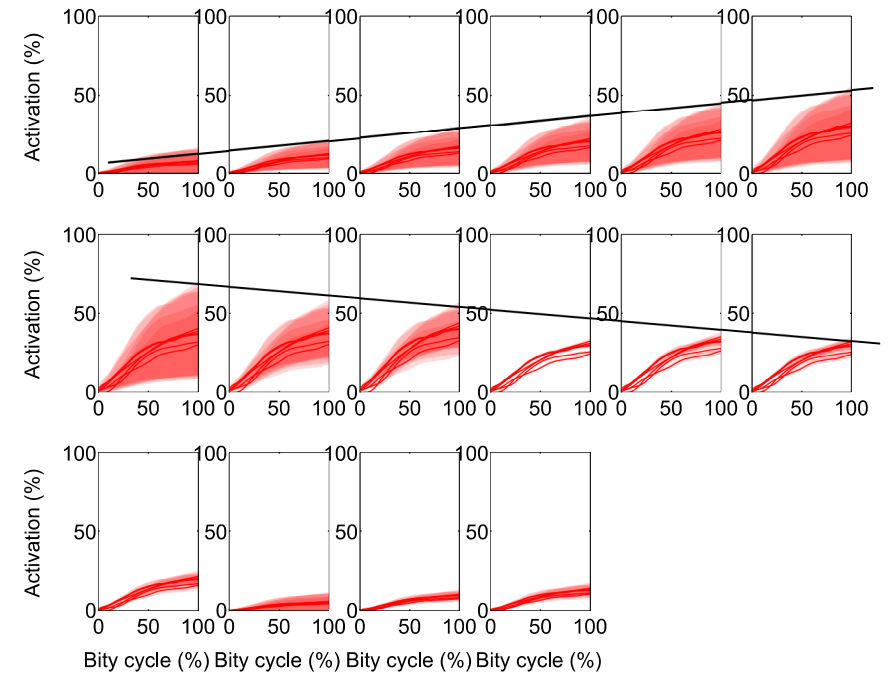

### Cordulegaster

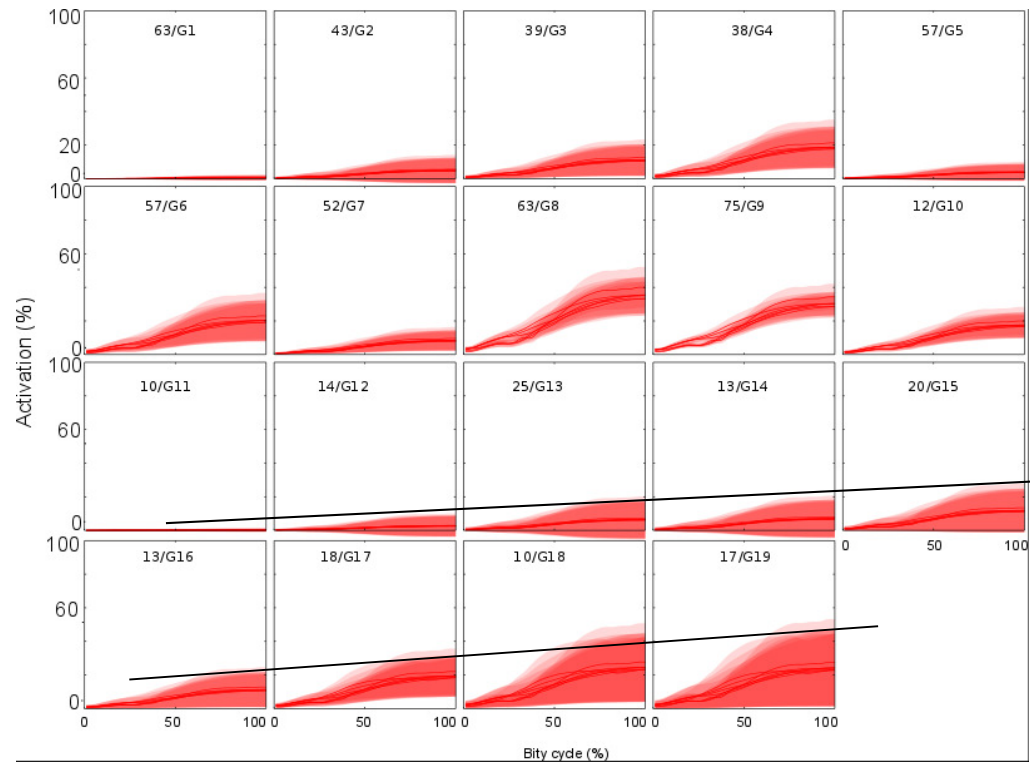

### Onychogomphus

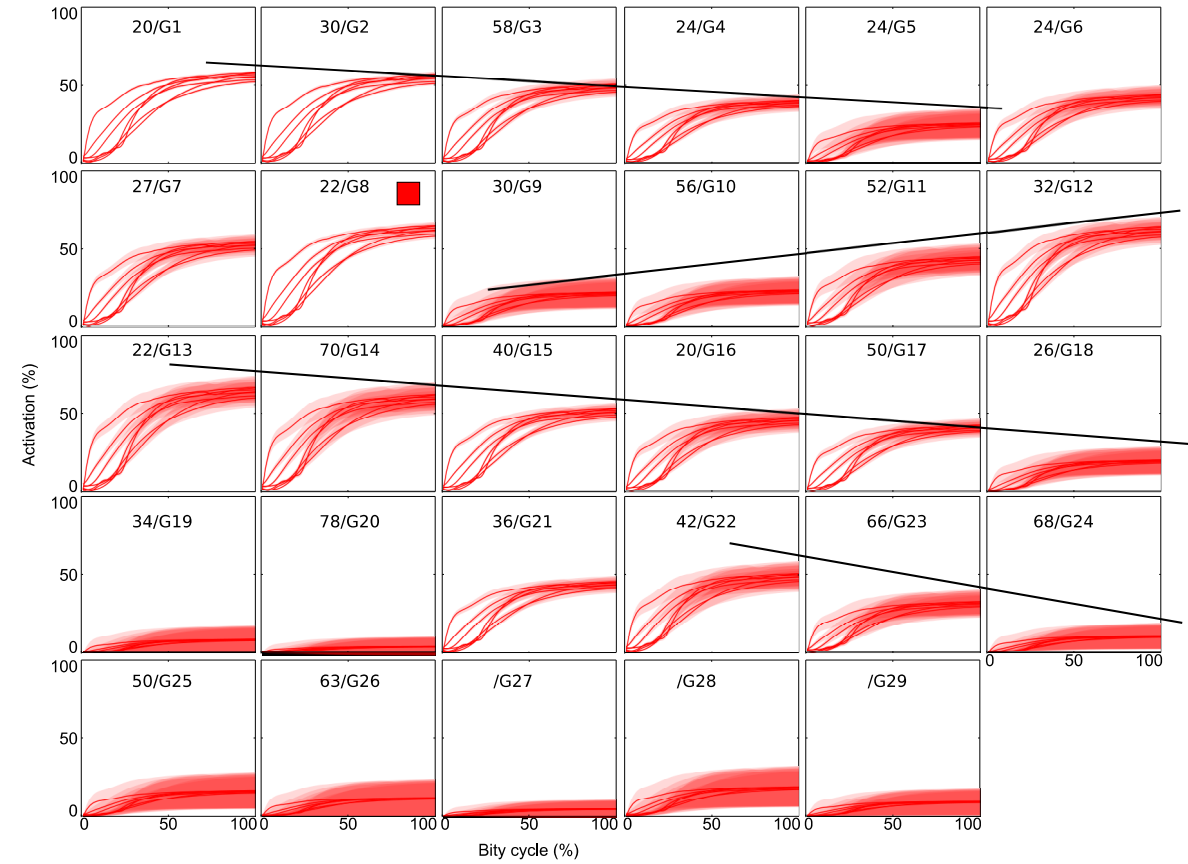

Supplement: rsif20160675supp2.pdf [file rsif20160675supp2.pdf]
